# Supplementary material for: Single transition metal atom embedded into a MoS2 nanosheet as a promising catalyst for electrochemical ammonia synthesis
Source: Royal Society of Chemistry journal article supplement (doi:10.1039/c7cp08626a), 2018-01-01
Supplement: c7cp08626a1.pdf [file c7cp08626a1.pdf]

## Supporting Information

### **Single Transition Metal Atom Embedded into MoS<sub>2</sub> Nanosheet as a Promising Catalyst for Electrochemical Ammonia Synthesis**

Jia Zhao,<sup>†</sup> Jingxiang Zhao,<sup>\*,†</sup> Qinghai Cai<sup>†</sup>

<sup>†</sup> College of Chemistry and Chemical Engineering, and Key Laboratory of Photonic and Electronic Bandgap Materials, Ministry of Education, Harbin Normal University, Harbin, 150025, China

\* To whom correspondence should be addressed. Email: xjz\_hmily@163.com (JZ)

**Table S1.** The charge transfer ( $\Delta Q$ ,  $|e|$ ) and magnetic moment transfer ( $\Delta \mu$ ,  $\mu_B$ ) between the adsorbed  $N_2$  species and TM-doped  $MoS_2$  monolayer.

| TM | $\Delta Q$ | $\Delta \mu$ |
|----|------------|--------------|
| Sc | 0.01       | 0.00         |
| Ti | 0.01       | 0.00         |
| Cr | 0.02       | 0.02         |
| Mn | 0.02       | 0.02         |
| Rh | 0.01       | 0.00         |
| V  | 0.13       | 0.08         |
| Fe | 0.13       | 0.09         |
| Co | 0.11       | 0.08         |
| Ni | 0.10       | 0.07         |
| Mo | 0.08       | 0.06         |
| Ru | 0.09       | 0.06         |

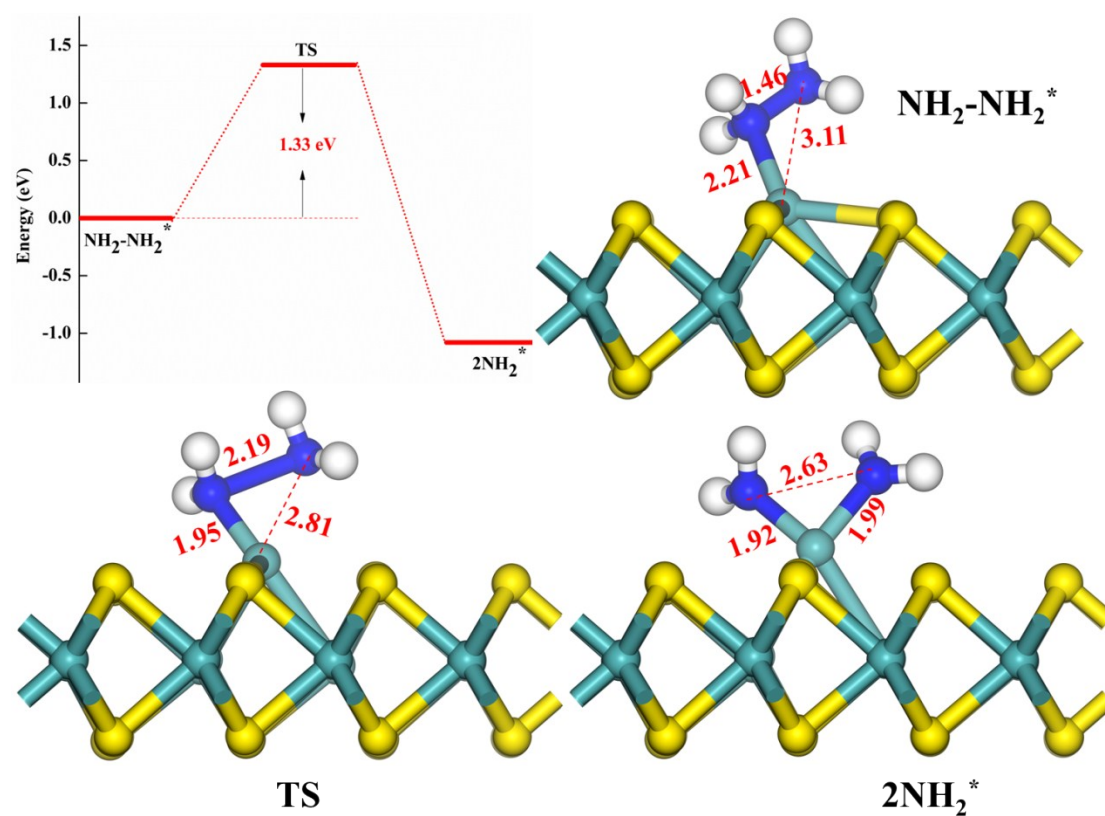

**Fig. S1.** The computed dissociation pathway of  $\text{NH}_2\text{-NH}_2^*$  to  $2\text{NH}_2$  and the corresponding structures.

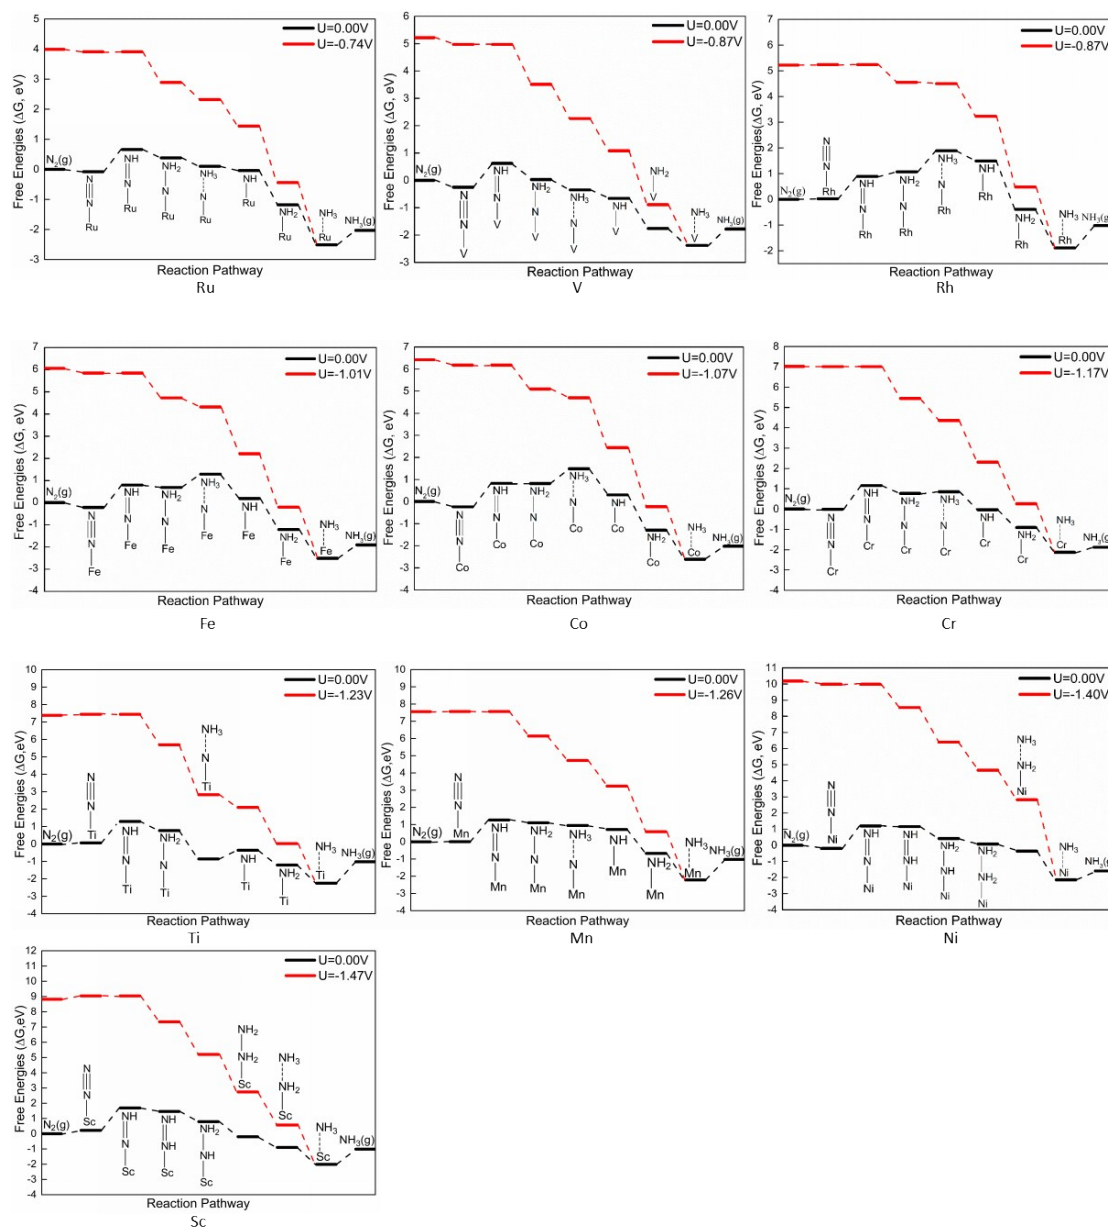

**Fig. S2.** The computed free energy profiles of NRR on various TM-doped MoS<sub>2</sub> nanosheets.
